# Supplementary material for: Mixed valence triiron complexes from the conjugation of [FeIFeI] and [FeII] complexes via intermolecular carbyne/alkyne coupling
Source: Royal Society of Chemistry journal article supplement (doi:10.1039/d4dt00079j), 2024-01-01
Supplement: d4dt00079j3.pdf [file d4dt00079j3.pdf]

# Mixed Valence Triiron Complexes from the Conjugation of Dinuclear [CpFe<sup>I</sup>-Fe<sup>I</sup>Cp] and [Fe<sup>II</sup>] Complexes via Intermolecular Carbyne/Diyne Coupling

Giulio Bresciani,<sup>a,c,\*</sup> Gianluca Ciancaleoni,<sup>a,c</sup> Stefano Zacchini,<sup>b,c</sup> Lorenzo Biancalana,<sup>a,c</sup> Guido Pampaloni,<sup>a,c</sup> Tiziana Funaioli,<sup>a,c,\*</sup> Fabio Marchetti<sup>a,c</sup>

<sup>a</sup> University of Pisa, Department of Chemistry and Industrial Chemistry, Via G. Moruzzi 13, I-56124 Pisa, Italy

<sup>b</sup> University of Bologna, Department of Industrial Chemistry “Toso Montanari”, Viale Risorgimento 4, I-40136 Bologna, Italy

<sup>c</sup> CIRCC, Via Celso Ulpiani 27, I-70126 Bari, Italy

## Corresponding Authors

[giulio.bresciani@dcci.unipi.it](mailto:giulio.bresciani@dcci.unipi.it); [tiziana.funaioli@unipi.it](mailto:tiziana.funaioli@unipi.it)

# Supporting Information

| <b><u>Table of contents</u></b>                                   | <i>Pages</i> |
|-------------------------------------------------------------------|--------------|
| <b>Figures S1-S14:</b> NMR spectra of products                    | S2-S8        |
| <b>Figures S15:</b> DFT optimized geometry of [5a1] <sup>2+</sup> | S9           |
| <b>Figures S16-S17:</b> spectroelectrochemical studies            | S10          |
| <b>Table S1:</b> comparative view of NMR data                     | S11          |
| <b>DFT optimized coordinates (XYZ)</b>                            | S12          |



**Figure S1.**  $^1\text{H}$  NMR spectrum (401 MHz, acetone- $d_6$ ) of  $[\mathbf{2a1}]\text{CF}_3\text{SO}_3$

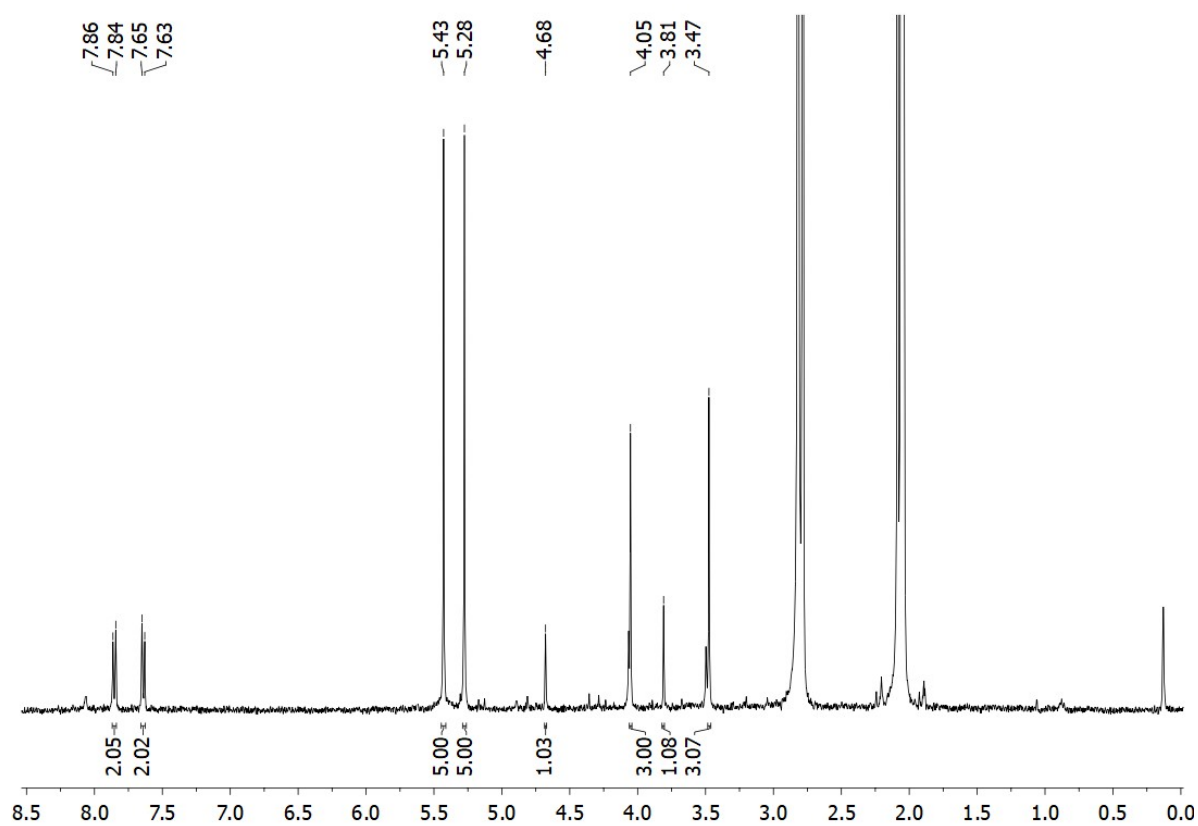

**Figure S2.**  $^{13}\text{C}\{^1\text{H}\}$  NMR spectrum (101 MHz, acetone- $d_6$ ) of  $[\mathbf{2a1}]\text{CF}_3\text{SO}_3$ .

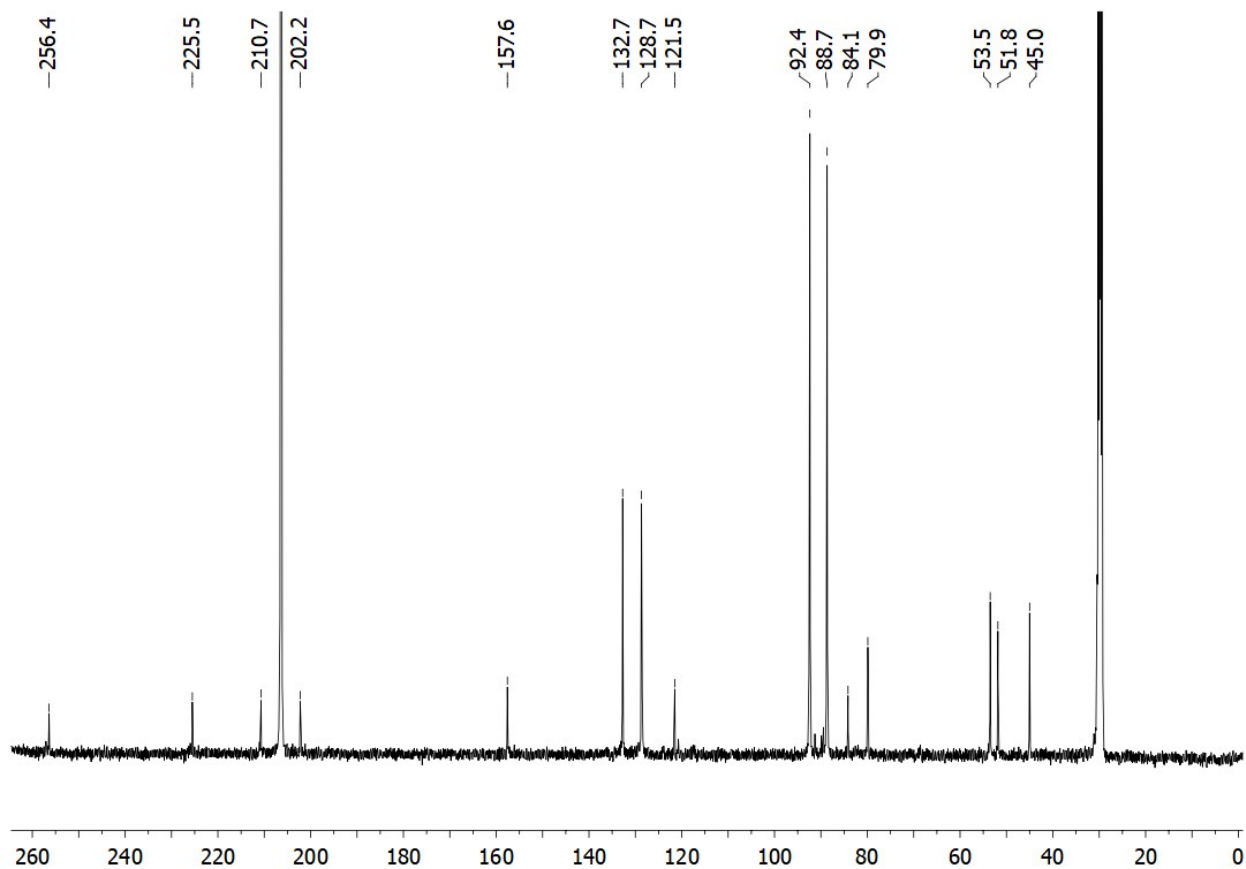

**Figure S3.**  $^1\text{H}$  NMR spectrum (401 MHz, acetone- $d_6$ ) of  $[\mathbf{2a2}]\text{CF}_3\text{SO}_3$

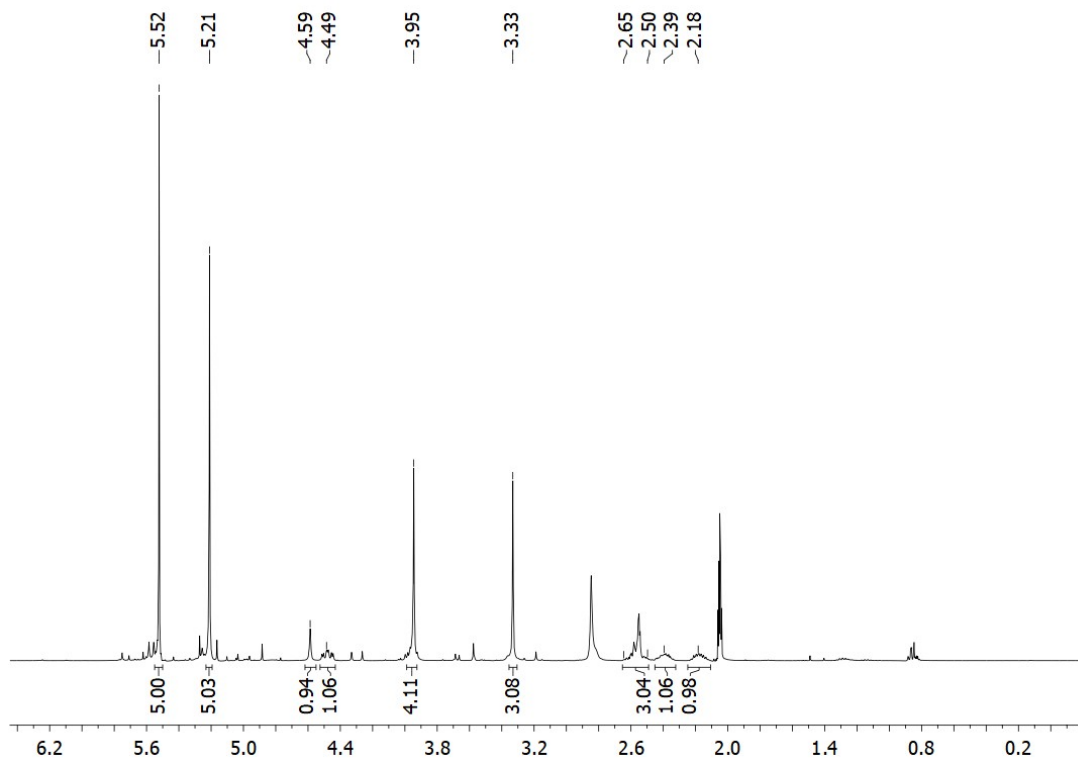

**Figure S4.**  $^{13}\text{C}\{^1\text{H}\}$  NMR spectrum (101 MHz, acetone- $d_6$ ) of  $[\mathbf{2a2}]\text{CF}_3\text{SO}_3$ .

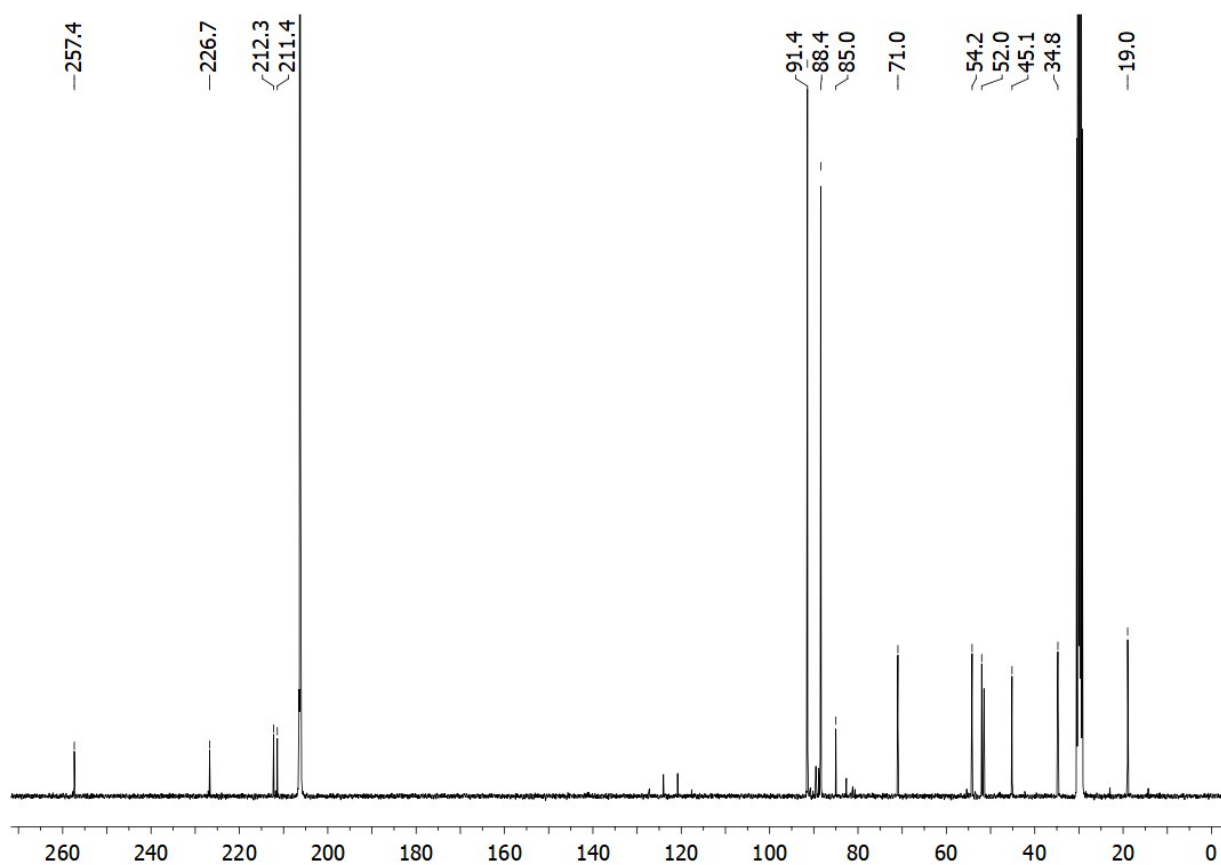

**Figure S5.**  $^1\text{H}$  NMR spectrum (401 MHz,  $\text{CDCl}_3$ ) of **3a1**.

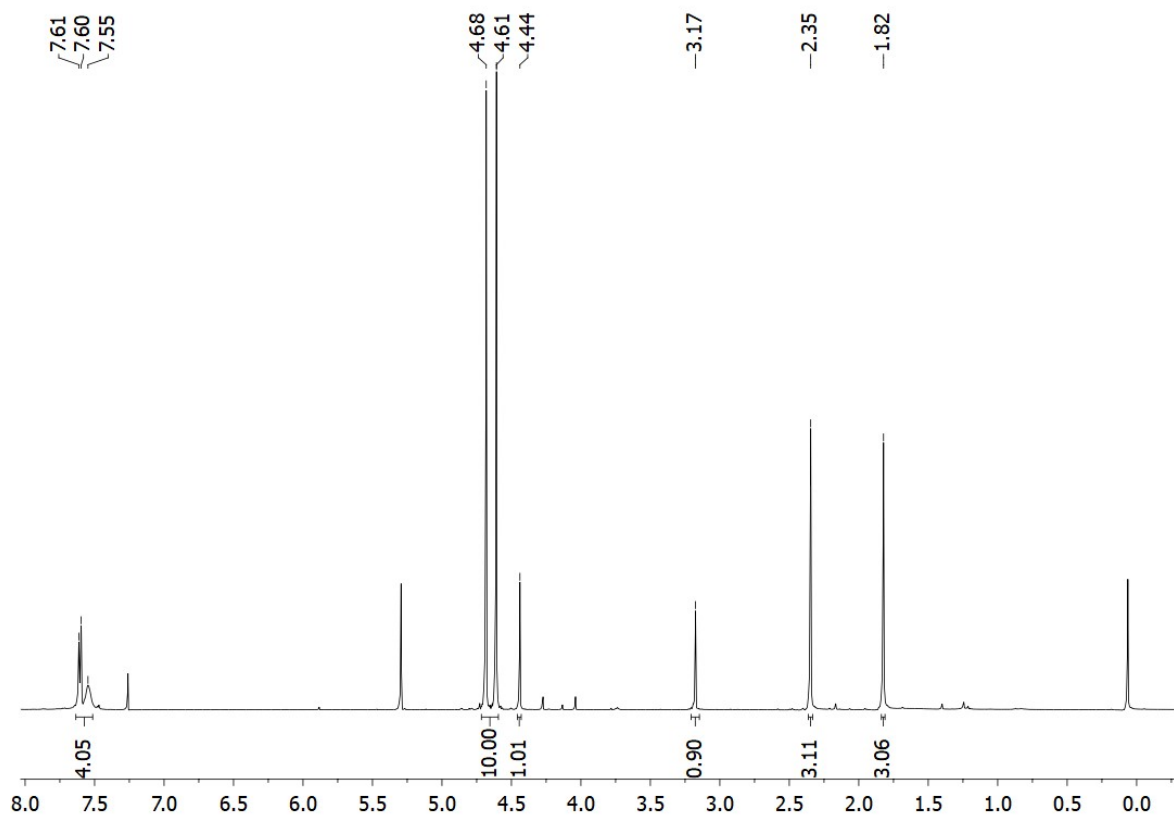

**Figure S6.**  $^{13}\text{C}\{^1\text{H}\}$  NMR spectrum (101 MHz,  $\text{CDCl}_3$ ) of **3a1**.

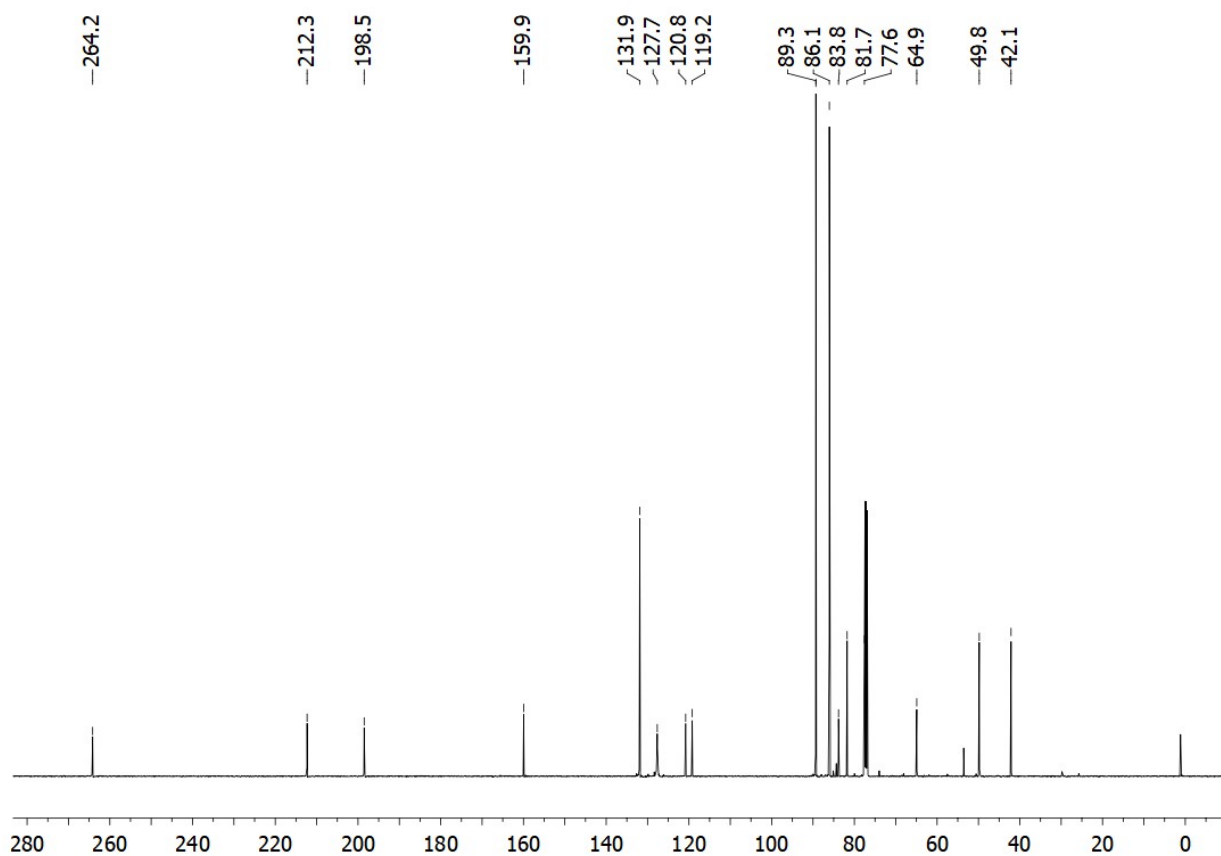

Figure S7.  $^1\text{H}$  NMR spectrum (401 MHz,  $\text{CDCl}_3$ ) of **3a2**.

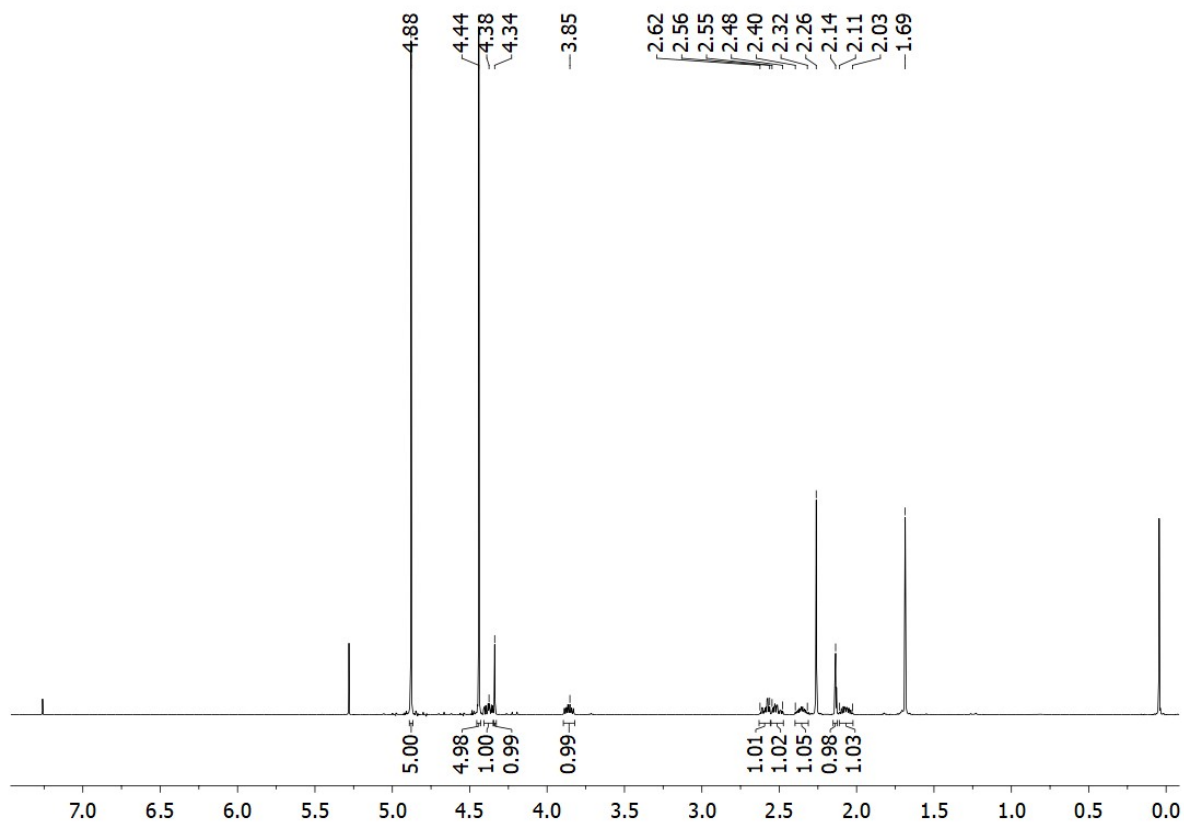

Figure S8.  $^{13}\text{C}\{^1\text{H}\}$  NMR spectrum (101 MHz,  $\text{CDCl}_3$ ) of **3a2**.

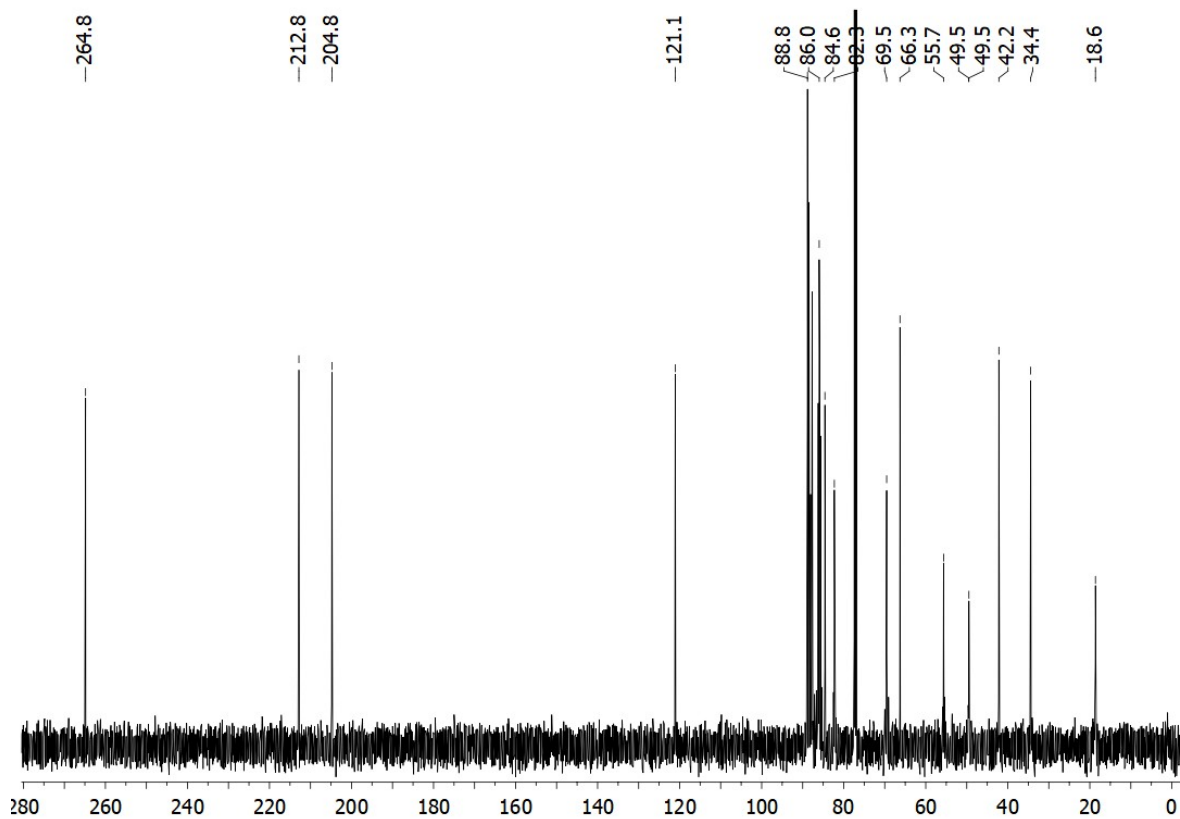

**Figure S9.**  $^1\text{H}$  NMR spectrum (401 MHz,  $\text{CDCl}_3$ ) of **4a1**.

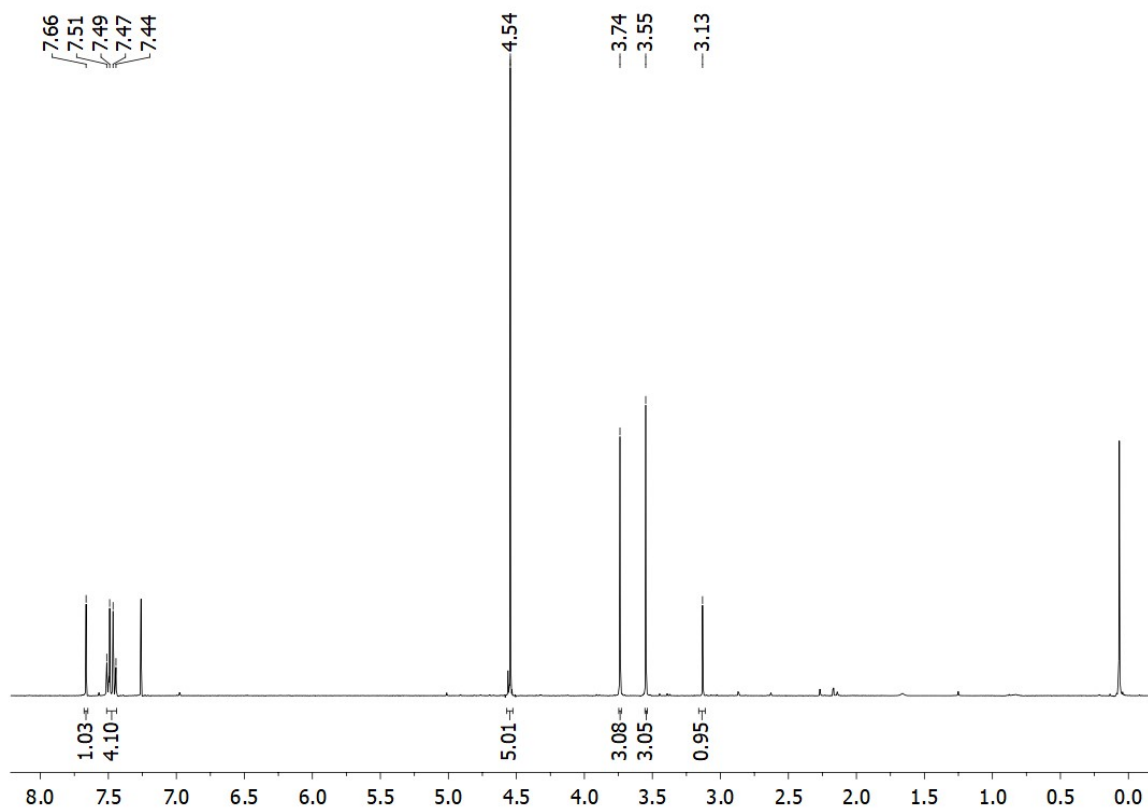

**Figure S10.**  $^{13}\text{C}\{^1\text{H}\}$  NMR spectrum (101 MHz,  $\text{CDCl}_3$ ) of **4a1**.

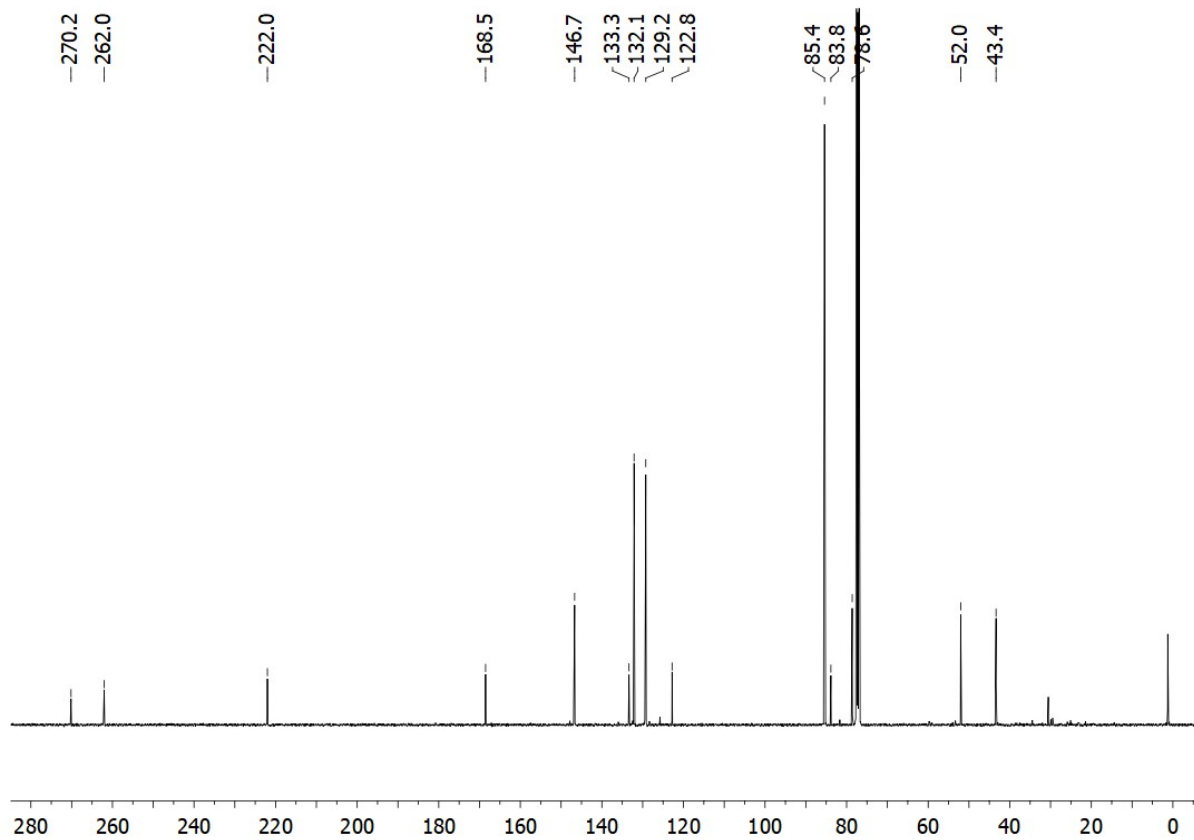

Figure S11.  $^1\text{H}$  NMR spectrum (401 MHz, acetone- $\text{d}_6$ ) of  $[\mathbf{5a1}]\text{CF}_3\text{SO}_3$ .

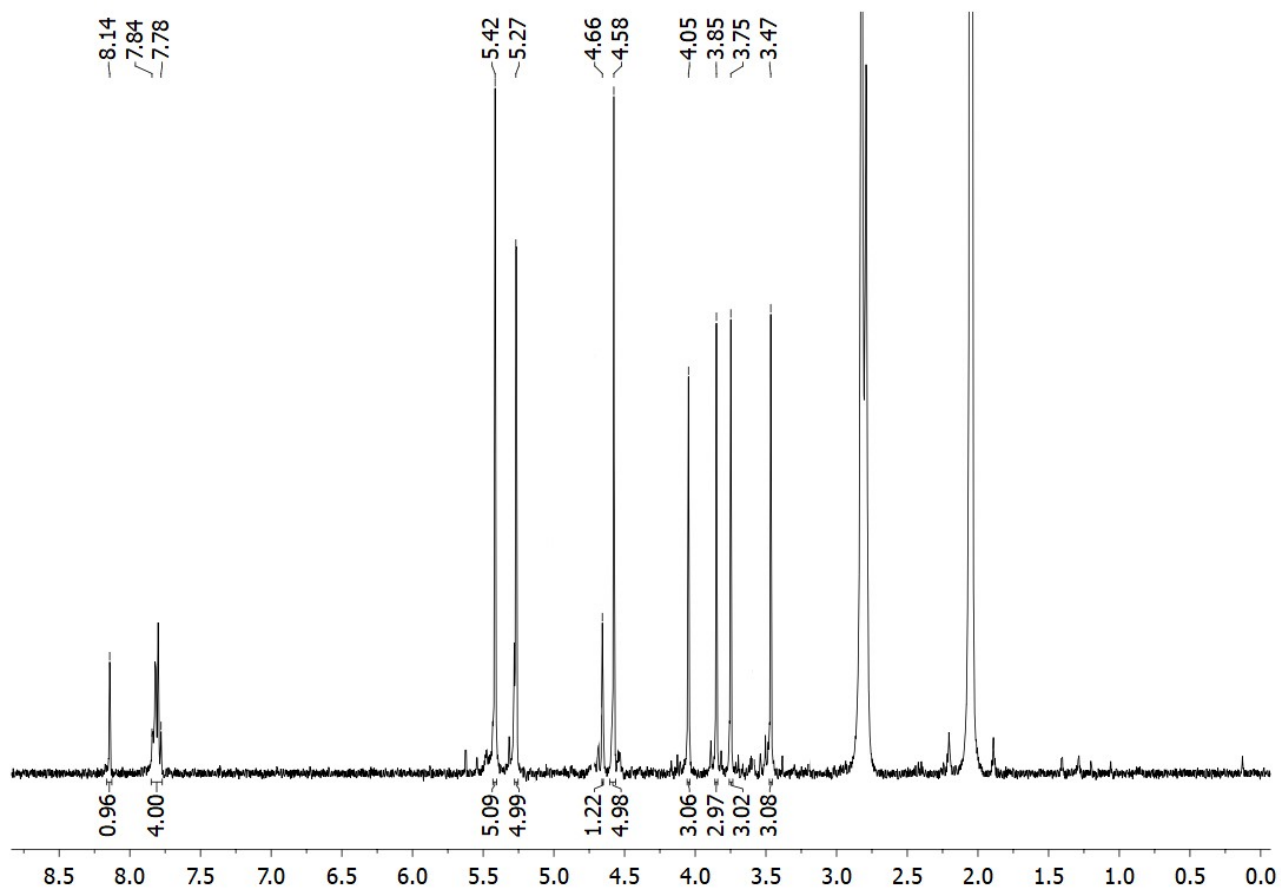

Figure S12.  $^{13}\text{C}\{^1\text{H}\}$  NMR spectrum (101 MHz, acetone- $\text{d}_6$ ) of  $[\mathbf{5a1}]\text{CF}_3\text{SO}_3$ .

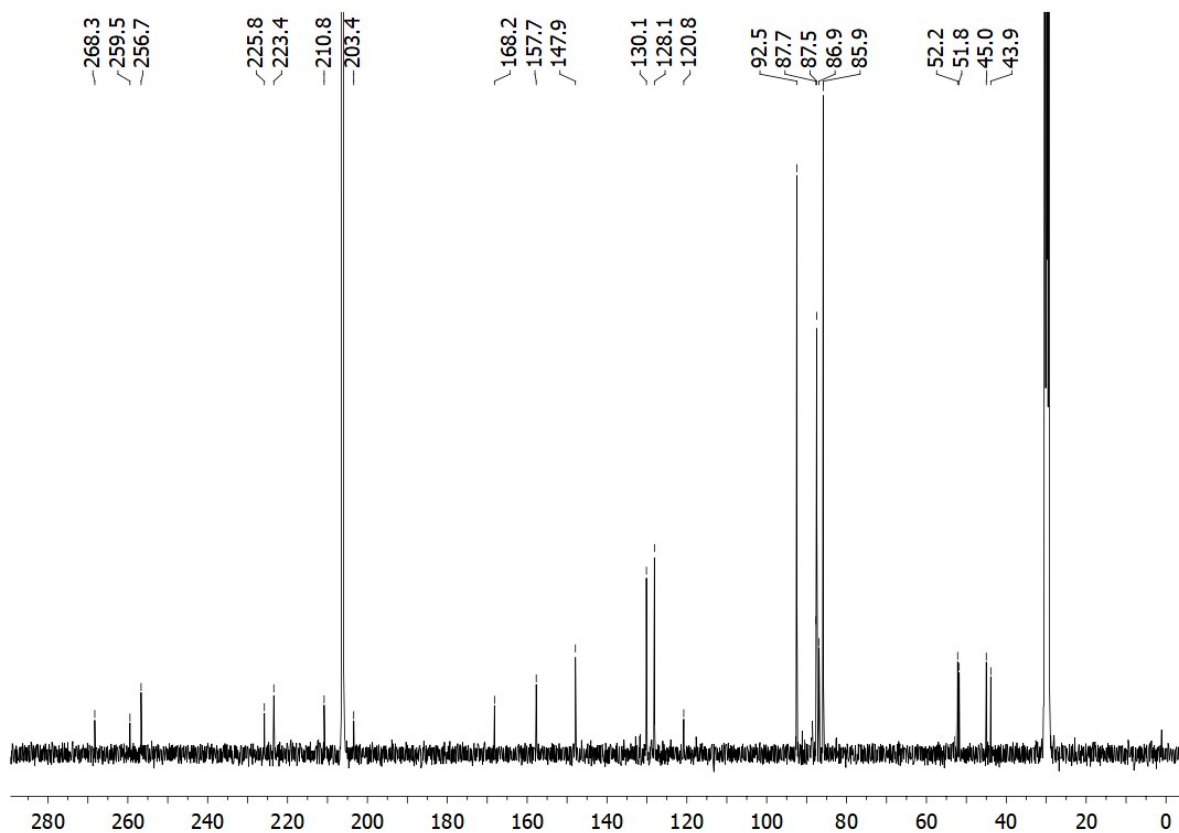



Figure S13.  $^1\text{H}$  NMR spectrum (401 MHz, acetone- $d_6$ ) of **[5b1]CF<sub>3</sub>SO<sub>3</sub>**.

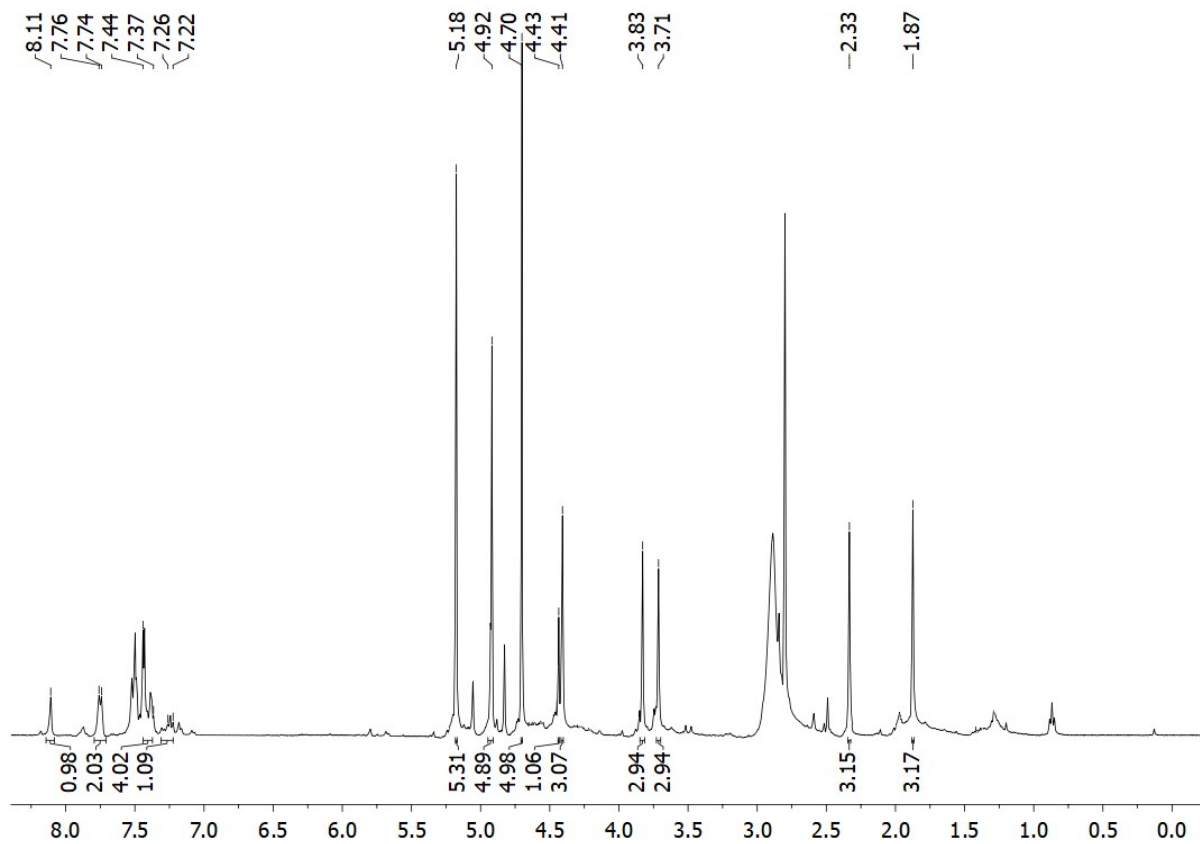

Figure S14.  $^{13}\text{C}\{^1\text{H}\}$  NMR spectrum (101 MHz, acetone- $d_6$ ) of **[5b1]CF<sub>3</sub>SO<sub>3</sub>**.

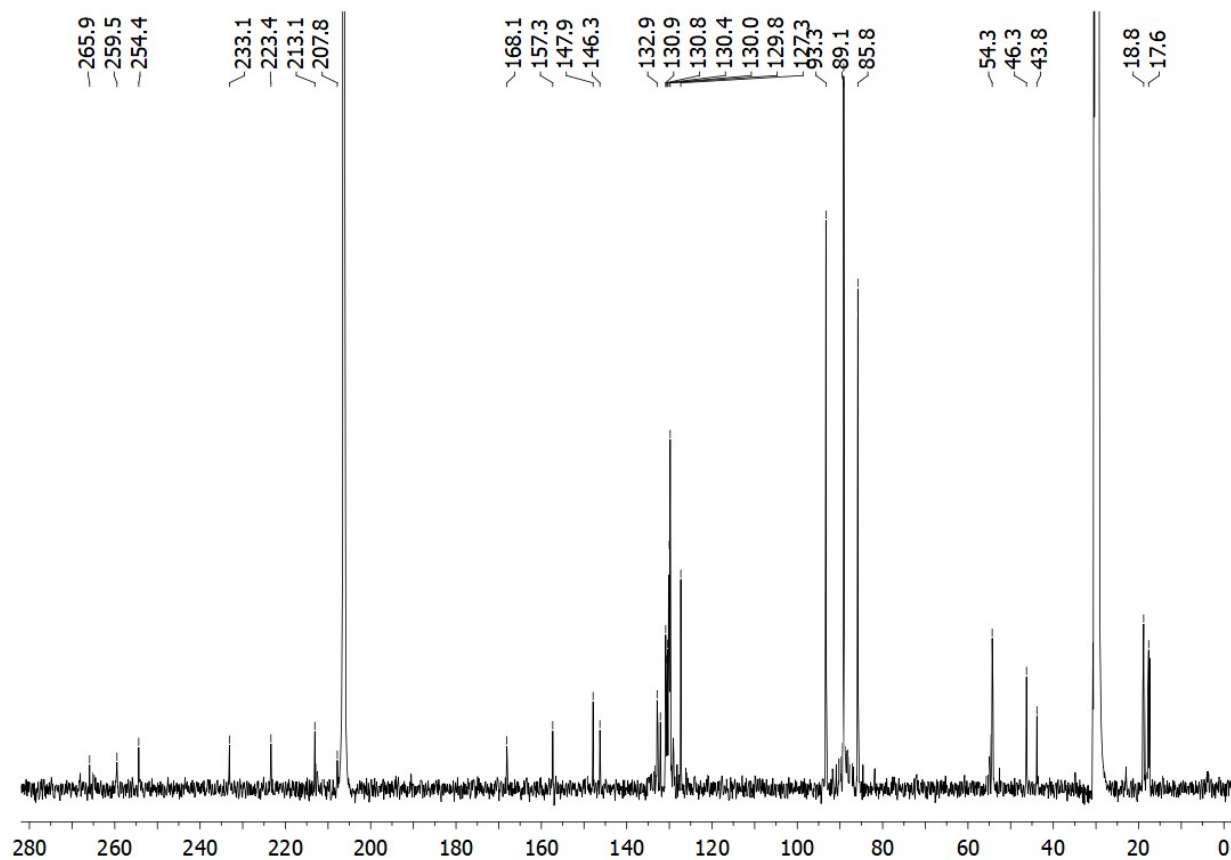

**Figure S15.** View of the DFT-optimized structure of  $[\mathbf{5a1}]^{2+}$  (doublet state). Calculated bond distances (Å) and angles (°): Fe(1)-C(1) 1.769, Fe(1)-C(2) 1.946, Fe(1)-C(5) 2.006, C(1)-O(1) 1.154, C(2)-N(1) 1.326, C(5)-O(2) 1.201, C(11)-C(12) 1.479, C(12)-C(13) 1.428, C(13)-C(14) 1.426, Fe(2)-C(12) 2.040, Fe(2)-C(13) 2.048, Fe(2)-C(14) 1.843, C(14)-N(2) 1.303, Fe(2)-C(18) 1.951, Fe(3)-C(12) 1.960, Fe(3)-C(18) 1.890, C(18)-O(3) 1.180, Fe(3)-C(17) 1.749, C(17)-O(2) 1.159, Fe(2)-Fe(3) 2.560, Fe(1)-C(1)-O(1) 178.9, C(2)-Fe(1)-C(5) 84.8, sum at N(1) 359.9, Fe(2)-C(12)-Fe(3) 79.6, Fe(3)-C(17)-O(2) 178.7, Fe(2)-C(18)-Fe(3) 88.6, sum at N(2) 360.0. Hydrogens atoms are omitted for clarity.

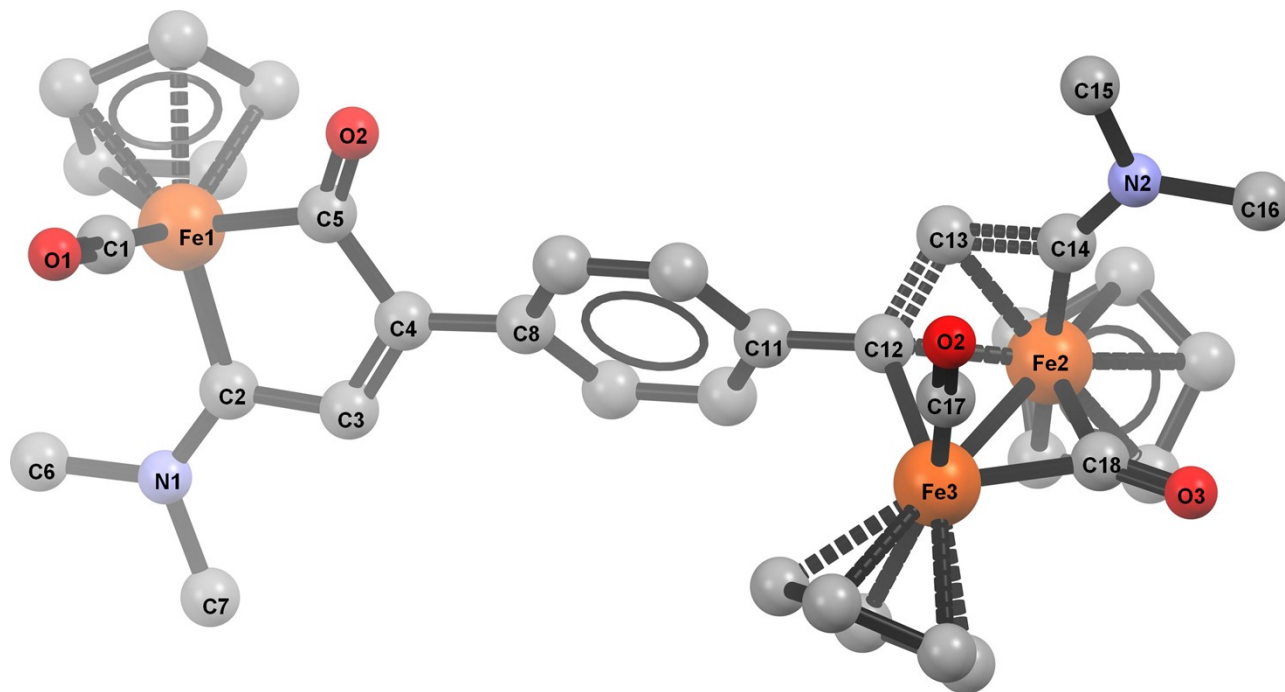

**Figure S16.** IR spectra of a  $\text{CH}_2\text{Cl}_2$  solution of **4a1** recorded in an OTTLE cell during the progressive increase of the potential from  $-0.1$  to  $+0.3$  V (vs. Ag pseudoreference electrode). Scan rate  $1.0 \text{ mV s}^{-1}$ ; spectra collected every minute.  $[\text{N}^n\text{Bu}_4]\text{PF}_6$  ( $0.2 \text{ mol dm}^{-3}$ ) as the supporting electrolyte. The absorptions of the solvent and supporting electrolyte have been subtracted.

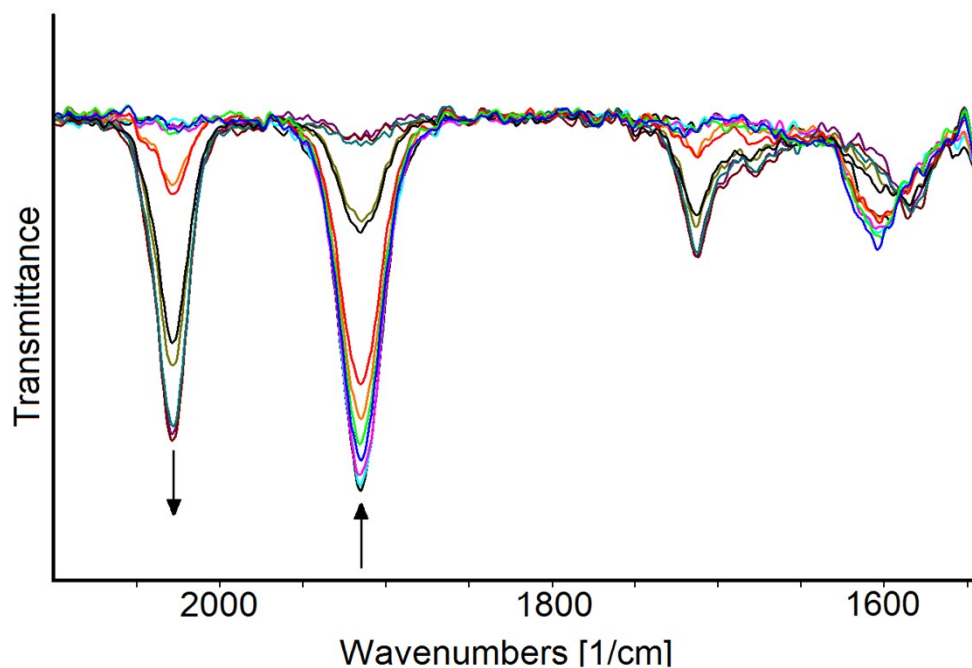

**Figure S17.** IR spectra of a  $\text{CH}_2\text{Cl}_2$  solution of **[5a1]CF<sub>3</sub>SO<sub>3</sub>** recorded in an OTTLE cell before (black line) and after (red line) a cyclic voltammetry between  $-0.6$  and  $-1.2$  V (vs. Ag pseudoreference electrode) at the scan rate of  $2 \text{ mV s}^{-1}$ . The green line is the difference spectrum (red minus black).  $[\text{N}^n\text{Bu}_4]\text{PF}_6$  ( $0.2 \text{ mol dm}^{-3}$ ) as the supporting electrolyte. The absorptions of the solvent and supporting electrolyte have been subtracted.

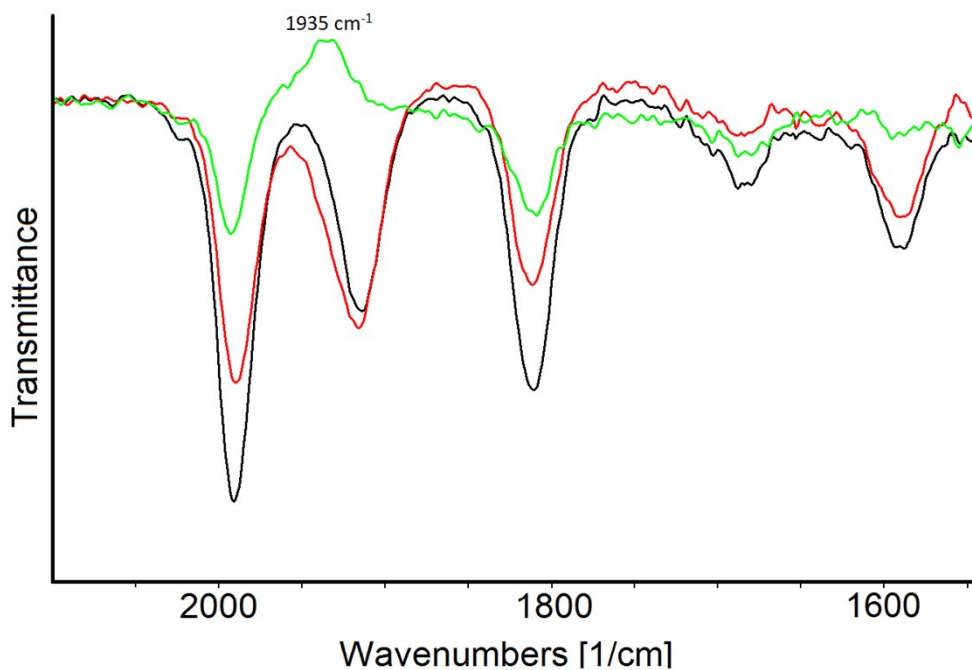

**Table S1.** Comparative view of  $^1\text{H}$  and  $^{13}\text{C}$  NMR data (solvent for analysis indicated in parentheses).

|                                                                 | 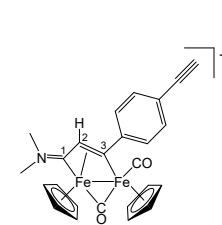<br><b>[2a1]CF<sub>3</sub>SO<sub>3</sub></b><br>(acetone-d <sub>6</sub> ) | <br><b>4a1</b><br>(CDCl <sub>3</sub> ) | <br><b>[5a1]CF<sub>3</sub>SO<sub>3</sub></b><br>(acetone-d <sub>6</sub> ) | <br><b>[5b1]CF<sub>3</sub>SO<sub>3</sub></b><br>(acetone-d <sub>6</sub> ) |            |
|-----------------------------------------------------------------|------------------------------------------------------------------------------------------------------------------------------------------------------------|-------------------------------------------------------------------------------------------------------------------------|-------------------------------------------------------------------------------------------------------------------------------------------------------------|--------------------------------------------------------------------------------------------------------------------------------------------------------------|------------|
| <b><math>^1\text{H}</math> NMR (<math>\delta</math>/ppm)</b>    |                                                                                                                                                            |                                                                                                                         |                                                                                                                                                             |                                                                                                                                                              |            |
| Fe <sub>2</sub> Cp <sub>2</sub>                                 | 5.43, 5.28                                                                                                                                                 |                                                                                                                         | 5.37, 5.14, 5.08, 4.88                                                                                                                                      | 5.42, 5.27                                                                                                                                                   | 5.18, 4.92 |
| C <sup>1</sup> -NMe <sub>x</sub>                                | 4.05, 3.47                                                                                                                                                 |                                                                                                                         | 4.25, 3.58                                                                                                                                                  | 4.05, 3.47                                                                                                                                                   | 4.41       |
| C <sup>2</sup> -H                                               | 4.68                                                                                                                                                       |                                                                                                                         | 4.97, 3.94                                                                                                                                                  | 4.66                                                                                                                                                         | 4.43       |
| FeCp                                                            |                                                                                                                                                            | 4.54                                                                                                                    |                                                                                                                                                             | 4.58                                                                                                                                                         | 4.70       |
| C <sup>5</sup> -H                                               |                                                                                                                                                            | 7.66                                                                                                                    |                                                                                                                                                             | 8.14                                                                                                                                                         | 8.11       |
| C <sup>6</sup> -NMe <sub>2</sub>                                |                                                                                                                                                            | 3.74, 3.55                                                                                                              |                                                                                                                                                             | 3.85, 3.75                                                                                                                                                   | 3.83, 3.71 |
| Me <sup>Xyl</sup>                                               |                                                                                                                                                            |                                                                                                                         | 2.51, 2.01, 2.20, 1.79                                                                                                                                      |                                                                                                                                                              | 2.33, 1.87 |
| <b><math>^{13}\text{C}</math> NMR (<math>\delta</math>/ppm)</b> |                                                                                                                                                            |                                                                                                                         |                                                                                                                                                             |                                                                                                                                                              |            |
| Fe <sub>2</sub> Cp <sub>2</sub>                                 | 92.4, 88.7                                                                                                                                                 |                                                                                                                         | 92.2, 92.1, 88.0, 87.9                                                                                                                                      | 92.5, 87.5                                                                                                                                                   | 93.3, 90.1 |
| Fe <sub>2</sub> CO                                              | 210.7                                                                                                                                                      |                                                                                                                         | 210.3, 209.6                                                                                                                                                | 210.8                                                                                                                                                        | 213.1      |
| $\mu$ -CO                                                       | 256.4                                                                                                                                                      |                                                                                                                         | 253.2                                                                                                                                                       | 256.7                                                                                                                                                        | 254.4      |
| C <sup>1</sup> -NMe <sub>x</sub>                                | 51.8, 45.0                                                                                                                                                 |                                                                                                                         | 52.5, 45.9                                                                                                                                                  | 52.2, 45.0                                                                                                                                                   | 43.8       |
| C <sup>1</sup>                                                  | 225.5                                                                                                                                                      |                                                                                                                         | 231.9, 230.4                                                                                                                                                | 225.8                                                                                                                                                        | 233.1      |
| C <sup>2</sup>                                                  | 53.5                                                                                                                                                       |                                                                                                                         | 53.6, 53.4                                                                                                                                                  | 53.8                                                                                                                                                         | 54.3       |
| C <sup>3</sup>                                                  | 202.2                                                                                                                                                      |                                                                                                                         | 207.6, 207.1                                                                                                                                                | 203.4                                                                                                                                                        | 207.8      |
| FeCp                                                            |                                                                                                                                                            | 85.4                                                                                                                    |                                                                                                                                                             | 85.9                                                                                                                                                         | 85.8       |
| Fe-CO                                                           |                                                                                                                                                            | 222.0                                                                                                                   |                                                                                                                                                             | 223.4                                                                                                                                                        | 223.4      |
| CO <sup>acyl</sup>                                              |                                                                                                                                                            | 270.2                                                                                                                   |                                                                                                                                                             | 268.3                                                                                                                                                        | 265.0      |
| C <sup>4</sup>                                                  |                                                                                                                                                            | 168.5                                                                                                                   |                                                                                                                                                             | 168.2                                                                                                                                                        | 168.1      |
| C <sup>5</sup>                                                  |                                                                                                                                                            | 146.7                                                                                                                   |                                                                                                                                                             | 147.9                                                                                                                                                        | 147.9      |
| C <sup>6</sup> -NMe <sub>2</sub>                                |                                                                                                                                                            | 52.0, 43.4                                                                                                              |                                                                                                                                                             | 51.8, 43.9                                                                                                                                                   | 54.3, 46.3 |
| C <sup>6</sup>                                                  |                                                                                                                                                            | 262.2                                                                                                                   |                                                                                                                                                             | 259.5                                                                                                                                                        | 259.5      |
| Me <sup>Xyl</sup>                                               |                                                                                                                                                            |                                                                                                                         | 18.7, 18.0, 17.9, 17.2                                                                                                                                      |                                                                                                                                                              | 18.8, 17.6 |
| <i>ipso</i> -Xyl                                                |                                                                                                                                                            |                                                                                                                         | 145.1, 140.8                                                                                                                                                |                                                                                                                                                              | 146.3      |

<sup>a</sup> From: Albano, V. G.; Busetto, L.; Marchetti, F.; Monari, M.; Zacchini, S.; Zanotti, V. Diiron  $\mu$ -Vinyliminium Complexes from Acetylene Insertion into a Metal - Aminocarbene Bond, *Organometallics* **2003**, *22*, 1326-1331. E/Z ratio = 3. Signals related to Z isomer are italicized.

## DFT optimized coordinates (XYZ)

### [5a1]<sup>+</sup>

|    |           |           |           |
|----|-----------|-----------|-----------|
| Fe | 1.643700  | 0.331640  | -0.937586 |
| Fe | 0.099891  | -1.681147 | -1.352072 |
| O  | 1.541529  | -0.645812 | -3.658015 |
| O  | 0.085730  | 2.577295  | -1.911682 |
| C  | 0.697428  | 1.667802  | -1.528107 |
| C  | -1.201039 | -0.534668 | -1.941659 |
| C  | -1.204402 | -0.335389 | -0.531334 |
| H  | -2.102376 | -0.591774 | 0.057833  |
| C  | 0.071074  | -0.238632 | 0.103701  |
| C  | 1.251565  | -0.618727 | -2.510232 |
| C  | 3.304660  | -0.519853 | 0.180329  |
| H  | 3.313108  | -1.477403 | 0.699045  |
| C  | 3.690074  | -0.300551 | -1.185502 |
| H  | 4.010370  | -1.067151 | -1.893530 |
| C  | 3.573085  | 1.087863  | -1.465007 |
| H  | 3.777584  | 1.574935  | -2.419967 |
| C  | 3.100882  | 1.727796  | -0.263258 |
| H  | 2.906161  | 2.795989  | -0.143498 |
| C  | 2.955678  | 0.735653  | 0.750906  |
| H  | 2.595530  | 0.904976  | 1.766063  |
| N  | -1.956346 | -0.100959 | -2.914942 |
| C  | -2.965327 | 0.952327  | -2.720357 |
| H  | -2.719219 | 1.816290  | -3.361672 |
| H  | -2.968740 | 1.270342  | -1.668601 |
| H  | -3.961980 | 0.569123  | -3.001714 |
| C  | -1.823181 | -0.616830 | -4.283354 |
| H  | -1.758625 | 0.231023  | -4.985963 |
| H  | -2.706828 | -1.227248 | -4.542776 |
| H  | -0.908374 | -1.217932 | -4.357438 |
| C  | 1.215785  | -3.381529 | -0.613613 |
| H  | 2.094630  | -3.353223 | 0.030123  |
| C  | -0.138136 | -3.447421 | -0.188181 |
| H  | -0.489623 | -3.437821 | 0.845753  |
| C  | -0.971555 | -3.468297 | -1.358702 |
| H  | -2.062976 | -3.515749 | -1.364181 |
| C  | -0.123603 | -3.421685 | -2.511978 |
| H  | -0.442179 | -3.441696 | -3.554910 |
| C  | 1.224725  | -3.350192 | -2.047336 |
| H  | 2.110088  | -3.281753 | -2.681760 |
| Fe | -0.854276 | 0.481312  | 8.592452  |
| C  | -2.936462 | 0.239178  | 9.019976  |
| H  | -3.696916 | 0.629394  | 8.343576  |
| C  | -2.307993 | -1.043305 | 8.920944  |
| H  | -2.541900 | -1.816868 | 8.187465  |
| C  | -1.320553 | -1.129697 | 9.955897  |
| H  | -0.669224 | -1.986835 | 10.139998 |
| C  | -1.346891 | 0.082858  | 10.704342 |
| H  | -0.740925 | 0.321630  | 11.579033 |
| C  | -2.326663 | 0.936560  | 10.103674 |
| H  | -2.571950 | 1.950962  | 10.426487 |
| C  | -0.384948 | 2.135889  | 8.311210  |
| O  | -0.071052 | 3.241956  | 8.121256  |
| C  | 0.073662  | -0.254202 | 1.578235  |
| C  | 0.041716  | -0.134101 | 4.437057  |
| C  | 0.828717  | -1.164629 | 2.355157  |
| C  | -0.711541 | 0.702085  | 2.265402  |

|   |           |           |           |
|---|-----------|-----------|-----------|
| C | -0.728925 | 0.766569  | 3.659431  |
| C | 0.806087  | -1.111004 | 3.747889  |
| H | 1.422932  | -1.933055 | 1.855153  |
| H | -1.297454 | 1.425419  | 1.685961  |
| H | -1.335850 | 1.523205  | 4.160762  |
| H | 1.369164  | -1.854406 | 4.323386  |
| C | 0.031875  | -0.072018 | 5.898863  |
| C | 1.092497  | -0.364254 | 6.708282  |
| H | 2.068810  | -0.628614 | 6.282785  |
| C | -1.212699 | 0.354343  | 6.684960  |
| O | -2.270740 | 0.549267  | 6.112761  |
| C | 0.872549  | -0.193060 | 8.142989  |
| N | 1.881807  | -0.527650 | 8.967932  |
| C | 1.909895  | -0.093410 | 10.361914 |
| H | 1.613616  | -0.908196 | 11.049245 |
| H | 1.219963  | 0.751813  | 10.484731 |
| H | 2.936069  | 0.222901  | 10.621553 |
| C | 3.069066  | -1.289136 | 8.555769  |
| H | 2.826440  | -1.983974 | 7.739233  |
| H | 3.426512  | -1.884650 | 9.411980  |
| H | 3.887820  | -0.616891 | 8.234435  |

**[5a1]<sup>2+</sup>**

|    |           |           |           |
|----|-----------|-----------|-----------|
| Fe | 1.629325  | 0.254879  | -0.885039 |
| Fe | 0.066443  | -1.733528 | -1.283328 |
| O  | 1.522307  | -0.741913 | -3.605964 |
| O  | 0.119281  | 2.521848  | -1.900051 |
| C  | 0.713530  | 1.608591  | -1.506381 |
| C  | -1.229988 | -0.577317 | -1.899074 |
| C  | -1.234581 | -0.366067 | -0.488893 |
| H  | -2.136808 | -0.600579 | 0.103077  |
| C  | 0.044014  | -0.271320 | 0.139667  |
| C  | 1.226447  | -0.701955 | -2.464325 |
| C  | 3.225304  | -0.597347 | 0.286320  |
| H  | 3.182287  | -1.523837 | 0.856680  |
| C  | 3.631590  | -0.473151 | -1.085424 |
| H  | 3.930620  | -1.291509 | -1.743358 |
| C  | 3.581268  | 0.901626  | -1.447405 |
| H  | 3.817128  | 1.321172  | -2.426813 |
| C  | 3.125298  | 1.629422  | -0.294133 |
| H  | 2.977422  | 2.710939  | -0.240930 |
| C  | 2.924373  | 0.703859  | 0.775847  |
| H  | 2.568755  | 0.953609  | 1.775454  |
| N  | -1.970699 | -0.144187 | -2.879393 |
| C  | -2.968365 | 0.926264  | -2.703775 |
| H  | -2.693637 | 1.785454  | -3.339257 |
| H  | -2.993156 | 1.242341  | -1.652155 |
| H  | -3.961941 | 0.557211  | -3.012078 |
| C  | -1.836763 | -0.671098 | -4.246058 |
| H  | -1.703146 | 0.170071  | -4.946441 |
| H  | -2.753485 | -1.222204 | -4.522190 |
| H  | -0.962178 | -1.330740 | -4.298741 |
| C  | 1.111376  | -3.436508 | -0.481530 |
| H  | 1.950050  | -3.429825 | 0.215236  |
| C  | -0.268010 | -3.486587 | -0.145828 |
| H  | -0.688606 | -3.486185 | 0.861899  |
| C  | -1.026639 | -3.498450 | -1.367600 |
| H  | -2.116036 | -3.537640 | -1.442853 |
| C  | -0.107217 | -3.462841 | -2.461473 |

|    |           |           |           |
|----|-----------|-----------|-----------|
| H  | -0.355935 | -3.479572 | -3.523458 |
| C  | 1.210033  | -3.402782 | -1.911126 |
| H  | 2.133308  | -3.350426 | -2.491000 |
| Fe | -0.792741 | 0.450590  | 8.654932  |
| C  | -2.925799 | 0.347190  | 8.922797  |
| H  | -3.608624 | 1.092805  | 8.511581  |
| C  | -2.468439 | -0.832435 | 8.258736  |
| H  | -2.778394 | -1.171133 | 7.268820  |
| C  | -1.554203 | -1.510626 | 9.131353  |
| H  | -1.044111 | -2.452529 | 8.920006  |
| C  | -1.487382 | -0.770897 | 10.351643 |
| H  | -0.883960 | -1.026598 | 11.225260 |
| C  | -2.306791 | 0.387300  | 10.214910 |
| H  | -2.448511 | 1.166757  | 10.967498 |
| C  | -0.463049 | 2.180228  | 8.823836  |
| O  | -0.265905 | 3.310554  | 8.945981  |
| C  | 0.066387  | -0.216861 | 1.617816  |
| C  | 0.073859  | 0.044915  | 4.467058  |
| C  | 0.705472  | -1.178260 | 2.436227  |
| C  | -0.579608 | 0.867963  | 2.258704  |
| C  | -0.581709 | 0.999746  | 3.647726  |
| C  | 0.708737  | -1.052029 | 3.824621  |
| H  | 1.188000  | -2.042547 | 1.974878  |
| H  | -1.071529 | 1.631339  | 1.645392  |
| H  | -1.083885 | 1.854861  | 4.104771  |
| H  | 1.179564  | -1.835218 | 4.428933  |
| C  | 0.118479  | 0.168135  | 5.928071  |
| C  | 1.145149  | -0.279484 | 6.722885  |
| H  | 2.055300  | -0.687236 | 6.269114  |
| C  | -1.024813 | 0.821065  | 6.697222  |
| O  | -1.924013 | 1.434424  | 6.189846  |
| C  | 1.004983  | -0.101410 | 8.155845  |
| N  | 2.029543  | -0.322078 | 8.968623  |
| C  | 1.950246  | -0.008951 | 10.398992 |
| H  | 2.025870  | -0.934104 | 10.998002 |
| H  | 0.997633  | 0.495354  | 10.611715 |
| H  | 2.783794  | 0.660358  | 10.675338 |
| C  | 3.344192  | -0.820020 | 8.512186  |
| H  | 3.219416  | -1.698495 | 7.860229  |
| H  | 3.936483  | -1.119444 | 9.388892  |
| H  | 3.888399  | -0.027948 | 7.968452  |
